# Supplementary material for: Intestinal adaptations to a combination of different diets with and without endurance exercise
Source: J Int Soc Sports Nutr. 2016 Sep 14;13:35. doi: 10.1186/s12970-016-0147-6 (PMC5024503; doi:10.1186/s12970-016-0147-6)
Supplement: Additional file 3: — Spreadsheet of data for rates of glucose uptakes. (XLSX 118 kb) [file 12970_2016_147_MOESM3_ESM.xlsx]

## Sheet: Necropsy Data
	Daniel Fast vs Western Diet
Date	Rat #	Rat ID	Diet	Intervention	Group #	TOD weight	Intestinal length	cm/bwt	Liver mass	g/kg	Heart mass	g/kg	Brain mass	g/kg	Spleen mass	g/kg	Soleus	Gastroc.	Testicles
2014-02-24	105	3	Daniel Fast	exercise	1	502.46	122	242.805	15.77	31.3856	1.26	2.50766	2.23	4.43816	0.794	1.58023	0.19	2.74
2014-02-24	121	7	Daniel Fast	exercise	1	496.76	123	247.604	17.3446	34.9155	1.45	2.91891	2.3	4.63	0.809	1.62855	0.13	2.48
2014-02-25	137	11	Daniel Fast	exercise	1	501.49	103	205.388	16.456	32.8142	1.45	2.89138	2.15	4.28722	0.794	1.58328	0.14	2.51
2014-02-25	153	14	Daniel Fast	exercise	1	553.17	114	206.085	18.693	33.7925	1.55	2.80203	2.09	3.77822	0.799	1.4444	0.14	2.77
2014-02-26	169	18	Daniel Fast	exercise	1	518.44	119	229.535	16.441	31.7124	1.47	2.83543	2.37	4.57141	0.56	1.08016	0.17	2.5	3.875
2014-02-26	185	22	Daniel Fast	exercise	1	523.52	131	250.229	17.179	32.8144	1.48	2.82702	2.23	4.25963	0.751	1.43452	0.14	2.19	3.438
2014-02-26	201	26	Daniel Fast	exercise	1	533.8	136	254.777	18.3482	34.3728	1.56	2.92244	2.05	3.84039	0.763	1.42937	0.18	2.67	2.337
2014-02-24	107	4	Daniel Fast	sedentary	2	480.35	124	258.145	15.1	31.4354	1.07	2.22754	2.17	4.51754	0.7846	1.63339	0.14	2.43
2014-02-24	123	8	Daniel Fast	sedentary	2	529.21	132	249.428	19.242	36.3599	1.18	2.22974	2.14	4.04376	0.8	1.51169	0.15	2.52
2014-02-25	139	12	Daniel Fast	sedentary	2	451.67	118	261.253	13.34	29.5348	1.18	2.61253	2.2	4.87081	0.68	1.50552	0.17	2.42
2014-02-25	155	15	Daniel Fast	sedentary	2	496.65	139	279.875	15.767	31.7467	1.31	2.63767	1.94	3.90617	0.77	1.55039	0.12	2.56	3.758
2014-02-26	171	19	Daniel Fast	sedentary	2	521.33	131	251.28	18.1758	34.8643	1.26	2.4169	2.19	4.20079	0.804	1.54221	0.16	2.44	3.898
2014-02-26	187	23	Daniel Fast	sedentary	2	478.83	125	261.053	15.3	31.9529	1.43	2.98645	2.01	4.19773	0.918	1.91717	0.15	2.36	3.618
2014-02-26	203	27	Daniel Fast	sedentary	2	646.35	132	204.224	21.6454	33.4887	1.72	2.6611	2.21	3.4192	0.943	1.45896	0.13	2.78	3.396
2014-02-24	101	1	Western	exercise	3	546.77	120	219.471			1.37	2.50562	2.025	3.70357	0.705	1.28939	0.17	2.41
2014-02-24	117	5	Western	exercise	3	548.01	114	208.025	20.19	36.8424	1.25	2.28098	2.16	3.94153	0.876	1.59851	0.17	2.31
2014-02-25	213	9	Western	exercise	3	632.86	110	173.814	30.469	48.1449	1.77	2.79683	2.28	3.60269	0.916	1.4474	0.15	2.65
2014-02-25	165	16	Western	exercise	3	492.87	111	225.212	20.295	41.1772	1.48	3.00282	2.18	4.42307	0.683	1.38576	0.15	2.66	2.31
2014-02-26	181	20	Western	exercise	3	495.87	108	217.799	19.879	40.0891	1.1	2.21832	2.12	4.27531	0.53	1.06883	0.18	2.16	3.671
2014-02-26	197	24	Western	exercise	3	614.3	120	195.344	31.894	51.9193	1.52	2.47436	2.18	3.54875	0.76	1.23718	0.14	2.7	3.498
2014-02-24	103	2	Western	sedentary	4	605.67	126	208.034			1.62	2.67472	2.177	3.59437	0.915	1.51072	0.22	2.85
2014-02-24	119	6	Western	sedentary	4	512.56	124	241.923	20.72	40.4245	1.36	2.65335	2.15	4.19463	0.76	1.48275	0.17	2.62
2014-02-25	135	10	Western	sedentary	4	564.18	122	216.243	23.9345	42.4235	1.44	2.55238	2.08	3.68677	0.854	1.5137	0.21	2.63
2014-02-25	151	13	Western	sedentary	4	592.21	116	195.876	27.31	46.1154	1.7	2.8706	2.24	3.78244	0.8153	1.37671	0.21	2.47
2014-02-25	167	17	Western	sedentary	4	695.23	113	162.536	39.6148	56.9809	1.84	2.64661	2.21	3.1788	0.97	1.39522	0.2	2.6	1
2014-02-26	183	21	Western	sedentary	4	591.36	120	202.922	20.954	35.4336	1.55	2.62108	1.96	3.31439	0.82	1.38663	0.19	2.6	3.258
2014-02-26	199	25	Western	sedentary	4	668.59	134	200.422	30.015	44.893	1.72	2.57258	2.1	3.14094	0.983	1.47026	0.21	2.98	3.431

## Sheet: Intestinal Data
	Daniel Fast vs Western Diet
Date	Rat #	Rat ID	Diet	Intervention	Group #	TOD weight	TOD	Intestinal length	cm/kg	Proximal mass	Prox g/kg	Mid Mass	Mid g/kg	Distal mass	Dist g/kg	Total intestinal mass	g/cm	intestine mass/body mass	prox % mass	mid % mass	dist % mass	norm prox mass	norm mid mass	norm dist mass
2014-02-24	105	3	Daniel Fast	exercise	1	502.46	09:26:00	122	242.805	2.4247	4.82566	2.2867	4.55101	2.0609	4.10162	6.7723	0.0555107	13.4783	0.358032	0.337655	0.304313	4.82566	4.55101	4.10162		122	124
2014-02-24	121	7	Daniel Fast	exercise	1	496.76	11:08:00	123	247.604	2.418	4.86754	2.4104	4.85224	2.3614	4.7536	7.1898	0.0584537	14.4734	0.33631	0.335253	0.328438	4.86754	4.85224	4.7536		123	132
2014-02-25	137	11	Daniel Fast	exercise	1	501.49	09:22:00	103	205.388	2.391	4.76779	2.491	4.9672	2.47	4.92532	7.352	0.0713786	14.6603	0.325218	0.338819	0.335963	4.76779	4.9672	4.92532		103	118
2014-02-25	153	14	Daniel Fast	exercise	1	553.17	10:50:00	114	206.085	3.5298	6.38104	3.5402	6.39984	1.6889	3.05313	8.7589	0.0768325	15.834	0.402996	0.404183	0.192821	6.38104	6.39984	3.05313		114	139
2014-02-26	169	18	Daniel Fast	exercise	1	518.44	09:01:00	119	229.535	2.6992	5.20639	2.8845	5.56381	2.26	4.35923	7.8437	0.0659134	15.1294	0.344123	0.367747	0.288129	5.20639	5.56381	4.35923		119	131
2014-02-26	185	22	Daniel Fast	exercise	1	523.52	09:45:00	131	250.229	3.1969	6.10655	2.4694	4.71692	1.575	3.00848	7.2413	0.0552771	13.8319	0.441482	0.341016	0.217502	6.10655	4.71692	3.00848		131	125
2014-02-26	201	26	Daniel Fast	exercise	1	533.8	11:04:00	136	254.777	3.2904	6.16411	2.4224	4.53803	2.7886	5.22405	8.5014	0.0625103	15.9262	0.387042	0.284941	0.328017	6.16411	4.53803	5.22405		136	132
2014-02-24	107	4	Daniel Fast	sedentary	2	480.35	09:36:00	124	258.145	3.4902	7.26595	2.7601	5.74602	2.3469	4.88581	8.5972	0.0693323	17.8978	0.405969	0.321046	0.272984	7.26595	5.74602	4.88581		120	126
2014-02-24	123	8	Daniel Fast	sedentary	2	529.21	11:19:00	132	249.428	3.6353	6.8693	2.5215	4.76465	2.7726	5.23913	8.9294	0.067647	16.8731	0.407116	0.282382	0.310502	6.8693	4.76465	5.23913		114	124
2014-02-25	139	12	Daniel Fast	sedentary	2	451.67	09:33:00	118	261.253	2.295	5.08114	1.831	4.05384	1.2995	2.8771	5.4255	0.0459788		0.423002	0.33748	0.239517	0	0	0		110	122
2014-02-25	155	15	Daniel Fast	sedentary	2	496.65	11:02:00	139	279.875	3.1219	6.28592	3.3905	6.82674	3.0277	6.09624	9.5401	0.0686338	19.2089	0.32724	0.355395	0.317366	6.28592	6.82674	6.09624		111	116
2014-02-26	171	19	Daniel Fast	sedentary	2	521.33	09:10:00	131	251.28	2.8261	5.42094	2.4587	4.71621	2.531	4.85489	7.8158	0.0596626	14.992	0.361588	0.314581	0.323831	5.42094	4.71621	4.85489		108	113
2014-02-26	187	23	Daniel Fast	sedentary	2	478.83	10:35:00	125	261.053	3.0194	6.30579	2.583	5.3944	2.1287	4.44563	7.7311	0.0618488	16.1458	0.390552	0.334105	0.275342	6.30579	5.3944	4.44563		120	120
2014-02-26	203	27	Daniel Fast	sedentary	2	646.35	11:13:00	132	204.224	3.9856	6.16632	3.0318	4.69065	2.6529	4.10443	9.6703	0.0732598	14.9614	0.412149	0.313517	0.274335	6.16632	4.69065	4.10443			134
2014-02-24	101	1	Western	exercise	3	546.77	9:02AM	120	219.471	3.7106	6.7864	3.4149	6.24559	1.3674	2.50087	8.4929	0.0707742	15.5329	0.436906	0.402089	0.161005	6.7864	6.24559	2.50087
2014-02-24	117	5	Western	exercise	3	548.01	10:46:00	114	208.025	2.4	4.37948	2.743	5.00538	2.2383	4.08441	7.3813	0.0647482	13.4693	0.325146	0.371615	0.303239	4.37948	5.00538	4.08441
2014-02-25	213	9	Western	exercise	3	632.86	09:02:00	110	173.814	2.217	3.50314	2.524	3.98824	2.0078	3.17258	6.7488	0.0613527	10.664	0.328503	0.373992	0.297505	3.50314	3.98824	3.17258
2014-02-25	165	16	Western	exercise	3	492.87	11:13:00	111	225.212	2.0483	4.15586	2.0436	4.14633	1.3968	2.83401	5.4887	0.0494477	11.1362	0.373185	0.372329	0.254486	4.15586	4.14633	2.83401
2014-02-26	181	20	Western	exercise	3	495.87	09:21:00	108	217.799	2.2572	4.552	1.5269	3.07923	1.5824	3.19116	5.3665	0.0496898	10.8224	0.420609	0.284524	0.294866	4.552	3.07923	3.19116
2014-02-26	197	24	Western	exercise	3	614.3	10:45:00	120	195.344	3.048	4.96175	2.016	3.28178	2.6809	4.36415	7.7449	0.0645408	12.6077	0.393549	0.2603	0.34615	4.96175	3.28178	4.36415
2014-02-24	103	2	Western	sedentary	4	605.67	09:14:00	126	208.034	2.7014	4.46018	2.9085	4.80212	2.3698	3.91269	7.9797	0.063331	13.175	0.338534	0.364487	0.296979	4.46018	4.80212	3.91269
2014-02-24	119	6	Western	sedentary	4	512.56	10:57:00	124	241.923	2.8618	5.58335	3.3833	6.60079	2.8616	5.58296	9.1067	0.0734411	17.7671	0.314252	0.371518	0.31423	5.58335	6.60079	5.58296
2014-02-25	135	10	Western	sedentary	4	564.18	09:11:00	122	216.243	2.1406	3.79418	2.6406	4.68042	1.1751	2.08285	5.9563	0.0488221	10.5574	0.359384	0.443329	0.197287	3.79418	4.68042	2.08285
2014-02-25	151	13	Western	sedentary	4	592.21	10:39:00	116	195.876	2.823	4.76689	2.6593	4.49047	1.3294	2.24481	6.8117	0.0587216	11.5022	0.414434	0.390402	0.195164	4.76689	4.49047	2.24481
2014-02-25	167	17	Western	sedentary	4	695.23	11:24:00	113	162.536	3.2096	4.6166	2.7761	3.99307	1.9679	2.83057	7.9536	0.0703858	11.4402	0.403541	0.349037	0.247423	4.6166	3.99307	2.83057
2014-02-26	183	21	Western	sedentary	4	591.36	09:33:00	120	202.922	3.3375	5.64377	3.1353	5.30185	0.9759	1.65026	7.4487	0.0620725	12.5959	0.448065	0.420919	0.131016	5.64377	5.30185	1.65026
2014-02-26	199	25	Western	sedentary	4	668.59	10:54:00	134	200.422	3.0422	4.55017	2.2252	3.3282	2.7508	4.11433	8.0182	0.0598373	11.9927	0.379412	0.277519	0.34307	4.55017	3.3282	4.11433
2014-02-11	133	1	standard	practice		529	11:44:00	133	251.418	3.7431	7.0758	3.1108	5.88053	2.7777	5.25085	9.6316	0.072418	18.2072	0.388627	0.322979	0.288394	7.0758	5.88053	5.25085
2014-02-11	215	2	standard	practice		499.3	11:50:00	147	294.412	2.8445	5.69698	2.934	5.87623	1.6062	3.2169	7.3847	0.0502361	14.7901	0.385188	0.397308	0.217504	5.69698	5.87623	3.2169
2014-02-11	217	3	standard	practice		503.95	12:04:00	132	261.931	2.8372	5.62992	3.37	6.68717	2.6959	5.34954	8.9031	0.0674477	17.6666	0.318676	0.37852	0.302805	5.62992	6.68717	5.34954
	Group #							L cm	cm/kg	P g	P g/kg	M g	M g/kg	D g	D g/kg	total g	g/cm	g/kg					% mucosa
DF/E	1			DF	Exercise	518.52		121.143	233.775	2.85	5.47415	2.64351	5.08415	2.17211	4.20363	7.66563	0.0636966	14.7619					Exercise	0.0147619	0.233775	0.063146	78.3845	DF					0.000352856		DF	Exercise	0.000352856
						7.67277		4.09585	7.81775	0.180801	0.269381	0.164937	0.255283	0.162655	0.332248	0.276801	0.0030937	0.352856
DF/S	2				Sedendary	514.913		128.714	252.18	3.19621	6.19934	2.6538	5.17036	2.39419	4.64332	8.2442	0.0637662	16.6798					Sedendary	0.014462	0.25218	0.0573481	74.5242						0.00192754			Sedendary	0.00192754
						24.0402		2.59358	8.81199	0.211697	0.286672	0.184513	0.34354	0.212421	0.377942	0.548991	0.00343366	0.631526
WD/E	3			WD	Exercise	555.113		113.833	206.611	2.61352	4.72311	2.37807	4.29109	1.87893	3.35787	6.87052	0.0600923	12.3721					Exercise	0.0123721	0.206611	0.059881	77.0056	WD					0.000717903		WD	Exercise	0.000717903
						22.037		1.94501	7.24115	0.241133	0.422627	0.250137	0.444266	0.197597	0.272717	0.472644	0.003284	0.717903
WD/S	4				Sedendary	604.257		122.143	203.994	2.87373	4.77359	2.81833	4.74242	1.91864	3.20264	7.6107	0.0623731	12.7186					Sedendary	0.0127186	0.203994	0.0623482	77.5303						0.000898584			Sedendary	0.000898584
						23.2327		2.60011	8.98758	0.14826	0.245766	0.141048	0.389702	0.291343	0.527424	0.379225	0.00304667	0.898584						absolute M	abs. L	g/ cm							0.000693132
					DF	516.716		124.929	242.977	3.02311	5.83674	2.64866	5.12725	2.28315	4.42348	7.95491	0.0637314	15.6471
						12.1576		2.55917	6.21892	0.142359	0.214428	0.119141	0.206376	0.132421	0.249796	0.30665	0.00222481	0.430679
					WD	581.575		118.308	205.202	2.75363	4.75029	2.61513	4.53411	1.90032	3.27428	7.26908	0.0613204	12.5587
						17.4459		2.0242	5.80328	0.142745	0.23755	0.153013	0.299067	0.177957	0.303555	0.31658	0.00224273	0.579441
					E	535.409		117.769	221.238	2.74085	5.12752	2.521	4.71812	2.0368	3.81328	7.29865	0.0620331	13.6589
						12.2162		2.51636	6.52195	0.150053	0.264109	0.149452	0.27062	0.131474	0.244713	0.286415	0.00227017	0.511304
					S	559.585		125.429	228.087	3.03497	5.48646	2.73606	4.95639	2.15641	3.92298	7.92745	0.0630696	14.5469
						20.3133		1.98907	9.02228	0.13221	0.268634	0.114104	0.257026	0.185679	0.370818	0.332994	0.00221814	0.766902
					DFE v DFS	0.888885		0.144903	0.144759	0.238103	0.0905415	0.967584	0.843991	0.423446	0.400138	0.365988	0.98826	0.0244347
					WDE v WDS	0.169946		0.0337783	0.833375	0.387169	0.921087	0.160107	0.476581	0.917159	0.811397	0.261598	0.633716	0.780048
					DF v WD	0.00491528		0.0555392	0.000166801	0.194075	0.00225476	0.863117	0.111102	0.0938397	0.00697957	0.132464	0.453134	0.000303427
					E v S	0.327846		0.0247421	0.55067	0.154971	0.353317	0.26278	0.531157	0.609938	0.810619	0.169405	0.748196	0.455405
					DFS v WDS	0.0204809		0.0992883	0.00242995	0.236625	0.00267299	0.492901	0.426874	0.212504	0.0467084	0.36187	0.767085	0.0058509
					DFE v WDE	0.146838		0.1608	0.0330111	0.461837	0.170677	0.405266	0.156757	0.291268	0.088179	0.18205	0.458429	0.013237
					DFS V WDE	0.263736		0.0011591	0.00294776	0.107518	0.0166477	0.406781	0.156896	0.117573	0.0243202	0.0981987	0.474669	0.00193493
					DFE v WDS	0.0021688		0.874076	0.016054	0.838671	0.0683866	0.750159	0.290975	0.636925	0.178271	0.931886	0.799313	0.0396243
						1=E 2=S
	3	Daniel Fast	exercise	1	1	502.46		122	242.805	2.4247	4.82566	2.2867	4.55101	2.0609	4.10162	6.7723	0.0555107	0.0134783	0.358032	0.337655	0.304313	0.00482566	0.00455101	0.00410162
	7	Daniel Fast	exercise	1	1	496.76		123	247.604	2.418	4.86754	2.4104	4.85224	2.3614	4.7536	7.1898	0.0584537	0.0144734	0.33631	0.335253	0.328438	0.00486754	0.00485224	0.0047536
	11	Daniel Fast	exercise	1	1	501.49		103	205.388	2.391	4.76779	2.491	4.9672	2.47	4.92532	7.352	0.0713786	0.0146603	0.325218	0.338819	0.335963	0.00476779	0.0049672	0.00492532
	14	Daniel Fast	exercise	1	1	553.17		114	206.085	3.5298	6.38104	3.5402	6.39984	1.6889	3.05313	8.7589	0.0768325	0.015834	0.402996	0.404183	0.192821	0.00638104	0.00639984	0.00305313
	18	Daniel Fast	exercise	1	1	518.44		119	229.535	2.6992	5.20639	2.8845	5.56381	2.26	4.35923	7.8437	0.0659134	0.0151294	0.344123	0.367747	0.288129	0.00520639	0.00556381	0.00435923
	22	Daniel Fast	exercise	1	1	523.52		131	250.229	3.1969	6.10655	2.4694	4.71692	1.575	3.00848	7.2413	0.0552771	0.0138319	0.441482	0.341016	0.217502	0.00610655	0.00471692	0.00300848
	26	Daniel Fast	exercise	1	1	533.8		136	254.777	3.2904	6.16411	2.4224	4.53803	2.7886	5.22405	8.5014	0.0625103	0.0159262	0.387042	0.284941	0.328017	0.00616411	0.00453803	0.00522405
	1	Western	exercise	3	1	546.77		120	219.471	3.7106	6.7864	3.4149	6.24559	1.3674	2.50087	8.4929	0.0707742	0.0155329	0.436906	0.402089	0.161005	0.0067864	0.00624559	0.00250087
	5	Western	exercise	3	1	548.01		114	208.025	2.4	4.37948	2.743	5.00538	2.2383	4.08441	7.3813	0.0647482	0.0134693	0.325146	0.371615	0.303239	0.00437948	0.00500538	0.00408441
	9	Western	exercise	3	1	632.86		110	173.814	2.217	3.50314	2.524	3.98824	2.0078	3.17258	6.7488	0.0613527	0.010664	0.328503	0.373992	0.297505	0.00350314	0.00398824	0.00317258
	16	Western	exercise	3	1	492.87		111	225.212	2.0483	4.15586	2.0436	4.14633	1.3968	2.83401	5.4887	0.0494477	0.0111362	0.373185	0.372329	0.254486	0.00415586	0.00414633	0.00283401
	20	Western	exercise	3	1	495.87		108	217.799	2.2572	4.552	1.5269	3.07923	1.5824	3.19116	5.3665	0.0496898	0.0108224	0.420609	0.284524	0.294866	0.004552	0.00307923	0.00319116
	24	Western	exercise	3	1	614.3		120	195.344	3.048	4.96175	2.016	3.28178	2.6809	4.36415	7.7449	0.0645408	0.0126077	0.393549	0.2603	0.34615	0.00496175	0.00328178	0.00436415
	4	Daniel Fast	sedentary	2	2	480.35		124	258.145	3.4902	7.26595	2.7601	5.74602	2.3469	4.88581	8.5972	0.0693323	0.0178978	0.405969	0.321046	0.272984	0.00726595	0.00574602	0.00488581
	8	Daniel Fast	sedentary	2	2	529.21		132	249.428	3.6353	6.8693	2.5215	4.76465	2.7726	5.23913	8.9294	0.067647	0.0168731	0.407116	0.282382	0.310502	0.0068693	0.00476465	0.00523913
	12	Daniel Fast	sedentary	2	2	451.67		118	261.253	2.295	5.08114	1.831	4.05384	1.2995	2.8771	5.4255	0.0459788	0.0120121	0.423002	0.33748	0.239517	0.00508114	0.00405384	0.0028771
	15	Daniel Fast	sedentary	2	2	496.65		139	279.875	3.1219	6.28592	3.3905	6.82674	3.0277	6.09624	9.5401	0.0686338	0.0192089	0.32724	0.355395	0.317366	0.00628592	0.00682674	0.00609624
	19	Daniel Fast	sedentary	2	2	521.33		131	251.28	2.8261	5.42094	2.4587	4.71621	2.531	4.85489	7.8158	0.0596626	0.014992	0.361588	0.314581	0.323831	0.00542094	0.00471621	0.00485489
	23	Daniel Fast	sedentary	2	2	478.83		125	261.053	3.0194	6.30579	2.583	5.3944	2.1287	4.44563	7.7311	0.0618488	0.0161458	0.390552	0.334105	0.275342	0.00630579	0.0053944	0.00444563
	27	Daniel Fast	sedentary	2	2	646.35		132	204.224	3.9856	6.16632	3.0318	4.69065	2.6529	4.10443	9.6703	0.0732598	0.0149614	0.412149	0.313517	0.274335	0.00616632	0.00469065	0.00410443
	2	Western	sedentary	4	2	605.67		126	208.034	2.7014	4.46018	2.9085	4.80212	2.3698	3.91269	7.9797	0.063331	0.013175	0.338534	0.364487	0.296979	0.00446018	0.00480212	0.00391269
	6	Western	sedentary	4	2	512.56		124	241.923	2.8618	5.58335	3.3833	6.60079	2.8616	5.58296	9.1067	0.0734411	0.0177671	0.314252	0.371518	0.31423	0.00558335	0.00660079	0.00558296
	10	Western	sedentary	4	2	564.18		122	216.243	2.1406	3.79418	2.6406	4.68042	1.1751	2.08285	5.9563	0.0488221	0.0105574	0.359384	0.443329	0.197287	0.00379418	0.00468042	0.00208285
	13	Western	sedentary	4	2	592.21		116	195.876	2.823	4.76689	2.6593	4.49047	1.3294	2.24481	6.8117	0.0587216	0.0115022	0.414434	0.390402	0.195164	0.00476689	0.00449047	0.00224481
	17	Western	sedentary	4	2	695.23		113	162.536	3.2096	4.6166	2.7761	3.99307	1.9679	2.83057	7.9536	0.0703858	0.0114402	0.403541	0.349037	0.247423	0.0046166	0.00399307	0.00283057
	21	Western	sedentary	4	2	591.36		120	202.922	3.3375	5.64377	3.1353	5.30185	0.9759	1.65026	7.4487	0.0620725	0.0125959	0.448065	0.420919	0.131016	0.00564377	0.00530185	0.00165026
	25	Western	sedentary	4	2	668.59		134	200.422	3.0422	4.55017	2.2252	3.3282	2.7508	4.11433	8.0182	0.0598373	0.0119927	0.379412	0.277519	0.34307	0.00455017	0.0033282	0.00411433

## Sheet: t tests
	Rat ID	Group #	normalized g/cm	intestine mass/body mass	cm/bwt	intestine mass	intestine length	absolute g/cm	TOD weight
	3	1	0.0555107	0.0134783	0.242805	6.7723	122	0.0555107	502.46	0.000110478	27.8919
	7	1	0.0584537	0.0144734	0.247604	7.1898	123	0.0584537	496.76	0.00011767	29.0374
	11	1	0.0713786	0.0146603	0.205388	7.352	103	0.0713786	501.49	0.000142333	35.7957
	14	1	0.0768325	0.015834	0.206085	8.7589	114	0.0768325	553.17	0.000138895	42.5014
	18	1	0.0659134	0.0151294	0.229535	7.8437	119	0.0659134	518.44	0.000127138	34.1722
	22	1	0.0552771	0.0138319	0.250229	7.2413	131	0.0552771	523.52	0.000105587	28.9387
	26	1	0.0625103	0.0159262	0.254777	8.5014	136	0.0625103	533.8	0.000117104	33.368
	4	2	0.0693323	0.0178978	0.258145	8.5972	124	0.0693323	480.35	0.000144337	33.3038
	8	2	0.067647	0.0168731	0.249428	8.9294	132	0.067647	529.21	0.000127826	35.7995
	12	2	0.0459788	0.0120121	0.261253	5.4255	118	0.0459788	451.67	0.000101797	20.7673
	15	2	0.0686338	0.0192089	0.279875	9.5401	139	0.0686338	496.65	0.000138194	34.087
	19	2	0.0596626	0.014992	0.25128	7.8158	131	0.0596626	521.33	0.000114443	31.1039
	23	2	0.0618488	0.0161458	0.261053	7.7311	125	0.0618488	478.83	0.000129167	29.6151
	27	2	0.0732598	0.0149614	0.204224	9.6703	132	0.0732598	646.35	0.000113344	47.3515
	1	3	0.0707742	0.0155329	0.219471	8.4929	120	0.0707742	546.77	0.00012944	38.6972
	5	3	0.0647482	0.0134693	0.208025	7.3813	114	0.0647482	548.01	0.000118152	35.4827
	9	3	0.0613527	0.010664	0.173814	6.7488	110	0.0613527	632.86	9.69452e-05	38.8277
	16	3	0.0494477	0.0111362	0.225212	5.4887	111	0.0494477	492.87	0.000100326	24.3713
	20	3	0.0496898	0.0108224	0.217799	5.3665	108	0.0496898	495.87	0.000100207	24.6397
	24	3	0.0645408	0.0126077	0.195344	7.7449	120	0.0645408	614.3	0.000105064	39.6474
	2	4	0.063331	0.013175	0.208034	7.9797	126	0.063331	605.67	0.000104563	38.3577
	6	4	0.0734411	0.0177671	0.241923	9.1067	124	0.0734411	512.56	0.000143283	37.643
	10	4	0.0488221	0.0105574	0.216243	5.9563	122	0.0488221	564.18	8.65364e-05	27.5445
	13	4	0.0587216	0.0115022	0.195876	6.8117	116	0.0587216	592.21	9.91566e-05	34.7755
	17	4	0.0703858	0.0114402	0.162536	7.9536	113	0.0703858	695.23	0.000101241	48.9343
	21	4	0.0620725	0.0125959	0.202922	7.4487	120	0.0620725	591.36	0.000104966	36.7072
	25	4	0.0598373	0.0119927	0.200422	8.0182	134	0.0598373	668.59	8.94978e-05	40.0066
Animal #		Region	Dry Mucosa Dry Tissue= %Mucosa
1		P	87.602
2		P	84.0726
3		P	88.6414
4		P	50.6589
5		P	78.9809
6		P	81.7221							absolute M	abs. L	g/ cm		/bwt	x bwt
7		P	84.3305					DF	Exercise	7.66563	121.143	0.0632776	0.0636966	0.000122744	33.1007
8		P	75.6487						Sedendary	7.24171	128.714	0.0562619	0.0637662	0.000124158	33.1468
9		P	85.7355					WD	Exercise	6.87052	113.833	0.0603559	0.0600923	0.000108356	33.611
10		P	80.7487						Sedendary	7.6107	122.143	0.0623098	0.0623731	0.000104178	37.7098
11		P	84.438
12		P	72.9211							g/ cm
13		P	187.5						DFE	0.0636966
14		P	82.3529						DFS	0.0637662
15		P	74.5847						WDE	0.0600923
16		P	64.1196						WDS	0.0623731
17		P	75.0988
18		P	80.0388
19		P	78.4							/bwt
20		P							DFE	0.000122744
21		P	71.8686						DFS	0.000124158
22		P	82.6739						WDE	0.000108356
23		P	80.2424						WDS	0.000104178
24		P	78.9889
25		P	76.2208
26		P	74.954						DFE
27		P	75.6374						DFS
1		M	81.7204						WDE
2		M	84.2336						WDS
3		M	78.0992
4		M	65.5608
5		M	80.7566
6		M	86.2426
7		M	86.0437
8		M	81.2245
9		M	84.8958
10		M
11		M	82.8697
12		M	80.4428
13		M	72.9508
14		M	81.1465
15		M	77.0465
16		M	67.8967
17		M	76.1111
18		M	76.1636
19		M	82.3529
20		M	64.497
21		M	81.0627
22		M	74.5514
23		M	83.4455
24		M	76.0563
25		M	78.7185
26		M	75.3623
27		M	83.7414
1		D	61.8605
2		D	87.5283
4		D	71.4885
5		D	66.313
6		D	84.1463
7		D	75.1534
8		D	80.1136
9		D	94.9541
10		D	64.3678
11		D	68.6012
12		D	68.1818
13		D	68.0203
14		D	74.6988
15		D	74.6719
16		D	73.8916
17		D	70.8995
18		D	70.6806
19		D	75.7033
20		D	65.4762
21		D	62.9167
22		D	72.6937
23		D	65.2361
24		D	93.271
25		D	83.032
26		D	79.0932
27		D	67.7054

## Sheet: original Glucose Uptakes
DF vs WD	2014-02-24			2014-02-25				2014-02-26
	Solution M				Solution T				Solution W
DPM P	21630			DPM P	48960			DPM P	56230
DPM M	77084			DPM M	92740			DPM M	154498
	R	htm			R	htm			R	htm
Solution 1	0.280603	86.52		Solution 1	0.527928	195.84		Solution 1	0.363953	89.968
Treatment	Rat #	Rat ID	Region	Solution Day	Tissue #	Tare	W/Tissue	Tissue weight (mg)	DPM M	DPM P	J	J/mg
3	101	1	p	M	1	898	1272	37.4	22278	7168	10.5955	0.283303
			p	M	2	1117	1749	63.2	46178	13871	10.5561	0.167027
			m	M	3	984	1588	60.4	42466	11820	-1.11058	-0.018387	0
			m	M	4	1426	1953	52.7	49708	15238	14.9074	0.282872
			d	M	5	1305	1649	34.4	24485	7461	6.82427	0.19838
			d	M	6	1321	1616	29.5	23256	6527	0.0149865	0.000508017
4	103	2	p	M	7	1094	1631	53.7	28507	9845	21.3344	0.397288
			p	M	8	1261	1616	35.5	15898	4826	4.21837	0.118827
			m	M	9	1163	1919	75.6	75035	22705	19.0702	0.252251
			m	M	10	1412	1759	34.7	75035	22705	19.0702	0.549574
			d	M	11			0			0
			d	M	12	958	1579	62.1	27484	7674	-0.440278	-0.00708982	0
1	105	3	p	M	13	1088	1515	42.7	9964	4007	13.9976	0.327812
			p	M	14	1370	1836	46.6	22736	8066	19.4893	0.418224
			m	M	15	1137	1762	62.5	31085	11233	29.0159	0.464254
			m	M	16	963	1370	40.7	17519	6679	20.3781	0.500691
			d	M	17	565	899	33.4	15031	4192	-0.297546	-0.00890857	0
			d	M	18	1145	1378	23.3	10784	2809	-2.50835	-0.107655	0
2	107	4	p	M	19	874	1424	55	15890	4991	6.15139	0.111843
			p	M	20	577	1385	80.8	32249	10858	20.9065	0.258744
			m	M	21	1127	1945	81.8	26722	7374	-1.43635	-0.0175593	0
			m	M	22	996	1798	80.2	34795	12536	32.0437	0.399547
			d	M	23	1152	1503	35.1	17849	5499	5.66941	0.161522
			d	M	24	1085	1984	89.9	29955	9978	18.1754	0.202174
3	117	5	p	M	25	1179	1535	35.6	23000	6852	4.60161	0.129259
			p	M	26	1407	1840	43.3	27539	8683	11.0434	0.255044
			m	M	27	945	1430	48.5	26092	7920	6.91755	0.14263
			m	M	28	1138	1755	61.7	43402	14069	21.8478	0.354097
			d	M	29	1406	1894	48.8	30673	10057	16.7599	0.34344
			d	M	30	1473	1896	42.3	11884	3380	0.52374	0.0123816
4	119	6	p	M	31	1278	1864	58.6	32995	11447	25.2948	0.431651
			p	M	32	1135	1777	64.2	39255	12727	19.7865	0.308201
			m	M	33	921	1375	45.4	18623	6189	11.1342	0.245247
			m	M	34	1064	1727	66.3	36510	12952	31.2897	0.471941
			d	M	35	600	1111	51.1	33134	10780	17.1348	0.335318
			d	M	36	1137	1778	64.1	34366	12638	34.6139	0.539999
1	121	7	p	M	37	524	1150	62.6	19624	8136	30.3912	0.485482
			p	M	38	1799	2179	38	36245	13185	34.8422	0.916899
			m	M	39	1160	1715	55.5	19101	6673	15.178	0.273478
			m	M	40	1102	1647	54.5	13610	5118	15.0138	0.275482
			d	M	41	970	1279	30.9	13632	4588	8.81669	0.28533
			d	M	42	1050	1368	31.8	10728	4020	11.67	0.366982
2	123	8	p	M	43	555	909	35.4	13072	4329	7.63936	0.215801
			p	M	44	1407	2123	71.6	29254	10935	31.5099	0.440083
			m	M	45	1348	1928	58	28653	9861	21.0458	0.362859
			m	M	46	1555	2140	58.5	34759	10914	13.4133	0.229287
			d	M	47	894	1463	56.9	15927	5244	8.95557	0.157391
			d	M	48	1080	1857	77.7	37448	11499	11.4538	0.14741
3	213	9	p	T	49	1113	1612	49.9	21004	6164	-25.146	-0.503929	0
			p	T	50	1195	1587	39.2	15929	4770	-18.5834	-0.474065	0
			m	T	51	1031	1515	48.4	30866	10509	-29.5447	-0.610427	0
			m	T	52	980	1501	52.1	40800	13871	-39.1568	-0.75157	0
			d	T	53	1024	1434	41	27088	6884	-37.8703	-0.923665	0
			d	T	54	1349	1712	36.3	19716	5141	-26.8976	-0.740981	0
4	135	10	p	T	55	1409	1993	58.4	23511	7354	-25.8278	-0.442257	0
			p	T	56	894	1393	49.9	25382	7791	-28.6401	-0.573949	0
			m	T	57	1035	1555	52	30717	10951	-26.8861	-0.517039	0
			m	T	58	1198	1750	55.2	36169	12591	-33.2089	-0.60161	0
			d	T	59	1543	1876	33.3	24499	8203	-24.156	-0.725405	0
			d	T	60	968	1477	50.9	26884	10557	-18.5652	-0.364739	0
1	137	11	p	T	61	1090	1721	63.1	31760	11585	-26.4603	-0.41934	0
			p	T	62	944	1495	55.1	22311	6425	-27.3366	-0.496127	0
			m	T	63	1288	1638	35	13294	4337	-13.6912	-0.391176	0
			m	T	64	1332	1822	49	22340	8784	-15.3692	-0.313658	0
			d	T	65	1551	1934	38.3	23491	7304	-26.0292	-0.679613	0
			d	T	66	820	1183	36.3	21284	6202	-25.7068	-0.708176	0
2	139	12	p	T	67	1607	1898	29.1	21390	6814	-22.8675	-0.785826	0
			p	T	68	825	1216	39.1	20402	6755	-20.5054	-0.524436	0
			m	T	69	1073	1487	41.4	26441	8428	-28.2422	-0.682178	0
			m	T	70	1389	1630	24.1	16481	5244	-17.651	-0.732409	0
			d	T	71	1386	1901	51.5	28619	9156	-30.3961	-0.590215	0
			d	T	72	979	1230	25.1	14827	4219	-18.4262	-0.734112	0
4	151	13	p	T	73	1199	1640	44.1	21944	7079	-23.0078	-0.521719	0
			p	T	74	1050	1430	38	23630	8319	-21.2211	-0.55845	0
			m	T	75	978	1512	53.4	29824	10870	-24.8924	-0.46615	0
			m	T	76	1088	1662	57.4	48134	18822	-33.6463	-0.586172	0
			d	T	77	1021	1233	21.2	14970	4936	-15.1505	-0.714648	0
			d	T	78	1115	1458	34.3	22328	7159	-23.6345	-0.689052	0
1	153	14	p	T	79	977	1672	69.5	35489	12508	-31.7996	-0.457548	0
			p	T	80	949	1662	71.3	35354	13517	-26.2835	-0.368633	0
			m	T	81	1196	1780	58.4	24861	9995	-15.9815	-0.273656	0
			m	T	82	519	978	45.9	26121	9094	-23.9788	-0.522414	0
			d	T	83	1441	2054	61.3	33413	11728	-30.1862	-0.492433	0
			d	T	84	1555	1943	38.8	19959	6676	-19.7146	-0.508109	0
2	155	15	p	T	85	1009	1672	66.3	32855	11499	-29.8513	-0.450246	0
			p	T	86	1469	2207	73.8	41283	13876	-40.4333	-0.547876	0
			m	T	87	1377	2123	74.6	36199	9750	-47.7965	-0.640704	0
			m	T	88	1084	1676	59.2	31289	10331	-31.5938	-0.53368	0
			d	T	89	866	1490	62.4	48094	16285	-46.4929	-0.745079	0
			d	T	90	1517	1928	41.1	18404	6259	-17.6521	-0.429491	0
3	165	16	p	T	91	1081	1436	35.5	18126	6749	-14.4006	-0.405652	0
			p	T	92	950	1315	36.5	19583	7492	-14.5344	-0.398202	0
			m	T	93	1012	1250	23.8	13688	5138	-10.6632	-0.448033	0
			m	T	94	1035	1367	33.2	22348	7936	-19.7209	-0.594002	0
			d	T	95	1224	1478	25.4	14208	4492	-15.3636	-0.604865	0
			d	T	96	888	1145	25.7	14799	4541	-16.7065	-0.650059	0
4	167	17	p	T	97	1156	1612	45.6	12794	7143	1.98473	0.0435247
			p	T	98	973	1577	60.4	27184	10674	-18.7765	-0.31087	0
			m	T	99	1396	2049	65.3	38677	11221	-46.9652	-0.719223	0
			m	T	100	1407	1801	39.4	37942	12130	-40.3423	-1.02392	0
			d	T	101	1249	1553	30.4	22851	6624	-27.7762	-0.913689	0
			d	T	102	1128	1526	39.8	23779	7230	-27.1834	-0.683	0
1	169	18	p	W	103	1624			46145	14910
			p	W	104	579	1793	121.4	26558	8966	-7.779	-0.0640774	0
			m	W	105	1136	2217	108.1	36681	13032	-3.53633	-0.0327135	0
			m	W	106	1052	1766	71.4	31310	10886	-5.66163	-0.0792945	0
			d	W	107	1150	1670	52	29837	8684	-24.1782	-0.464965	0
			d	W	108	1293	1752	45.9	25839	7370	-22.61	-0.492593	0
2	171	19	p	W	109	1163	1691	52.8	32963	10994	-11.1482	-0.21114	0
			p	W	110	996	1434	43.8	20708	7505	-0.352755	-0.00805376	0
			m	W	111	1410	2063	65.3	34070	12638	2.64677	0.0405325
			m	W	112	1450	2073	62.3	38793	12832	-14.3031	-0.229585	0
			d	W	113	1233	1888	65.5	32784	11832	-1.10964	-0.016941	0
			d	W	114	1578	2100	52.2	24625	8601	-4.01632	-0.076941	0
3	181	20	p	W	115	1291	1678	38.7	37115	12051	-16.1959	-0.418498	0
			p	W	116	1523	2261	73.8	41522	14417	-7.72555	-0.104682	0
			m	W	117	1117	1538	42.1	31049	10538	-8.47383	-0.201279	0
			m	W	118	1408	1637	22.9	21284	7145	-6.6843	-0.291891	0
			d	W	119	1491	1817	32.6	22279	8029	-0.883722	-0.027108	0
			d	W	120	993	1403	41	20466	6743	-7.84346	-0.191304	0
4	183	21	p	W	121	968	1221	25.3	12741	4681	0.487686	0.0192761
			p	W	122	1399	1780	38.1	22942	7897	-5.03298	-0.132099	0
			m	W	123	1258	1630	37.2	35925	11081	-22.1635	-0.595794	0
			m	W	124	466	661	19.5	16601	5319	-8.03599	-0.412102	0
			d	W	125	1161	1775	61.4	56125	17921	-27.8528	-0.453628	0
			d	W	126	998	1346	34.8	31795	10066	-16.738	-0.480976	0
1	185	22	p	W	127	1541	2073	53.2	30731	10947	-2.64135	-0.0496494	0
			p	W	128	873	1544	67.1	36382	13369	1.41901	0.0211477
			m	W	129	1006	1753	74.7	51893	16605	-25.3602	-0.339494	0
			m	W	130	1260	2195	93.5	48281	17718	1.62269	0.017355
			d	W	131	1509	1958	44.9	30902	9349	-21.095	-0.469821	0
			d	W	132	1107	1672	56.5	26404	7833	-19.7494	-0.349547	0
2	187	23	p	W	133	1002	1499	49.7	38637	14162	1.11097	0.0223535
			p	W	134	1408	2219	81.1	43697	15832	-0.796393	-0.00981989	0
			m	W	135	1240	2161	92.1	48318	16433	-12.8098	-0.139086	0
			m	W	136	933	1580	64.7	45278	15481	-11.0935	-0.17146	0
			d	W	137	1244	1884	64	20797	6124	-16.0627	-0.25098	0
			d	W	138	1105	1748	64.3	20639	6573	-10.4329	-0.162253	0
3	197	24	p	W	139	1104	1586	48.2	30817	11113	-1.14415	-0.0237375	0
			p	W	140	1426	2119	69.3	52225	18235	-8.58572	-0.123892	0
			m	W	141	1167	1649	48.2	42150	13853	-16.5349	-0.343048	0
			m	W	142	1253	1752	49.9	44384	14793	-15.1241	-0.303088	0
			d	W	143	878	1355	47.7	28254	9557	-8.07093	-0.169202	0
			d	W	144	1094	1450	35.6	33992	11169	-13.3657	-0.375442	0
4	199	25	p	W	145	1030	1565	53.5	26412	10154	6.01632	0.112455
			p	W	146	954	1661	70.7	40720	14514	-3.40301	-0.0481331	0
			m	W	147	996	1687	69.1	62248	20621	-22.6118	-0.327233	0
			m	W	148	398	900	50.2	45842	14679	-22.2894	-0.444011	0
			d	W	149	1173	1834	66.1	70304	23348	-24.8905	-0.376558	0
			d	W	150	931	1489	55.8	45853	15963	-8.06211	-0.144482	0
1	201	26	p	W	151	616	1281	66.5	45483	15494	-11.7783	-0.177117	0
			p	W	152	1163	2016	85.3	59132	20145	-15.2972	-0.179335	0
			m	W	153	1047	1687	64	57268	17380	-38.4898	-0.601404	0
			m	W	154	1249	1762	51.3	42132	13239	-23.2868	-0.453933	0
			d	W	155	1184	1897	71.3	34368	10413	-23.2898	-0.326645	0
			d	W	156	982	1510	52.8	33500	10885	-14.5321	-0.275229	0
2	203	27	p	W	157	1425	2193	76.8	45063	17455	11.7174	0.15257
			p	W	158	1281	2046	76.5	30354	12052	11.1659	0.145959
			m	W	159	1101	1658	55.7	16812	8378	25.1114	0.450833
			m	W	160	1403	2184	78.1	40941	16634	19.2669	0.246695
			d	W	161	953	1558	60.5	17165	9142	32.1753	0.531823
			d	W	162	908	1473	56.5	24138	11261	27.5198	0.487077
			Incubation Bath Depletion
Descrip.	Tube	Day	DPM M	DPM P	J
Sample 1 tube 1	1	M	69973	20372	8.5225				Solution M
sample 1 tube 2	2	M	66092	19257	8.22222			DPM P	21630
sample 1 tube 3	3	M	29737	8788	5.12839			DPM M	77084
sample 2 tube 1	4	M	81930	23324	3.86265				R	htm
sample 2 tube 2	5	M	46457	12395	-7.40839			Solution 1	0.280603	86.52
sample 2 tube 3	6	M	67971	20920	21.3492
sample 3 tube 1	7	M	64721	19080	10.6229
sample 3 tube 2	8	M	59230	16141	-5.53763
sample 3 tube 3	9	M	58882	16910	4.47913
Sample 1 tube 1	1	T	24719	9190	-19.7091
sample 1 tube 2	2	T	808	339	-0.447127
sample 1 tube 3	3	T	13848	7739	2.18679				Solution T
sample 2 tube 1	4	T	22804	11661	-1.92943			DPM P	48960
sample 2 tube 2	5	T	16877	8807	-0.525084			DPM M	92740
sample 2 tube 3	6	T	17665	9829	2.56924				R	htm
sample 3 tube 1	7	T	38254	12820	-37.66			Solution 1	0.527928	195.84
sample 3 tube 2	8	T	36098	8871	-52.0125
sample 3 tube 3	9	T	30518	7399	-44.4868
Sample 1 tube 1	1	W	168276	55867	-59.7719
sample 1 tube 2	2	W	168197	52510	-96.7655
sample 1 tube 3	3	W	130968	42110	-61.7575
sample 2 tube 1	4	W	175062	54886	-98.1276				Solution W
sample 2 tube 2	5	W	146454	47339	-66.2833			DPM P	56230
sample 2 tube 3	6	W	178400	58956	-66.3927			DPM M	154498
sample 3 tube 1	7	W	167520	52379	-95.4829				R	htm
sample 3 tube 2	8	W	133063	41899	-72.5778			Solution 1	0.363953	89.968
sample 3 tube 3	9	W	130076	41624	-63.5509

## Sheet: Wet-Dry mass
Animal #	Region	Foil	Wet Tissue (mucosa and intestine)	All Dry (Mucosa/Tissue/Foil)	Foil + Dry Mucosa (Remove Tissue)	Dry Mucosa (Subract foil)	Dry Tissue (All Dry-Foil)	Dry Mucosa Dry Tissue= %Mucosa	Comments
1	P	0.39	0.5754	0.4513	0.4437	0.0537	0.0613	87.602
1	M	0.4077	0.5745	0.4728	0.4609	0.0532	0.0651	81.7204
1	D	0.4401	0.5162	0.4616	0.4534	0.0133	0.0215	61.8605
2	P	0.4343	0.6405	0.4839	0.476	0.0417	0.0496	84.0726
2	M	0.4612	0.6626	0.5297	0.5189	0.0577	0.0685	84.2336
2	D	0.4464	0.556	0.4905	0.485	0.0386	0.0441	87.5283
3	P	0.4827	0.6135	0.5276	0.5225	0.0398	0.0449	88.6414
3	M	0.4072	0.5152	0.4314	0.4261	0.0189	0.0242	78.0992
4	P	0.4353	0.5204	0.5036	0.4699	0.0346	0.0683	50.6589	Really red mucosa
4	M	0.4743	0.6236	0.5376	0.5158	0.0415	0.0633	65.5608	fat al along tissue section-barely red
4	D	0.4564	0.6198	0.5041	0.4905	0.0341	0.0477	71.4885	fatty-looks like sponge
5	P	0.4587	0.6157	0.5058	0.4959	0.0372	0.0471	78.9809	a little bit of red
5	M	0.4928	0.6902	0.5536	0.5419	0.0491	0.0608	80.7566	some fat
5	D	0.4232	0.5628	0.4609	0.4482	0.025	0.0377	66.313	fat along length
6	P	0.4197	0.6404	0.4859	0.4738	0.0541	0.0662	81.7221	some fat
6	M	0.5095	0.7492	0.5771	0.5678	0.0583	0.0676	86.2426	some fat
6	D	0.4816	0.7719	0.5308	0.523	0.0414	0.0492	84.1463	no fat
7	P	0.5076	0.7284	0.5778	0.5668	0.0592	0.0702	84.3305	little fat, high vasculature
7	M	0.4629	0.6906	0.5453	0.5338	0.0709	0.0824	86.0437	vascularized
7	D	0.3894	0.5241	0.422	0.4139	0.0245	0.0326	75.1534	small amount of fat, vasc.
8	P	0.3795	0.6173	0.4296	0.4174	0.0379	0.0501	75.6487	highly vascularized, fat
8	M	0.4141	0.6113	0.4631	0.4539	0.0398	0.049	81.2245	some vascularization, good amount of fat
8	D	0.4156	0.5959	0.4684	0.4579	0.0423	0.0528	80.1136	fatty
9	P	0.4892	0.7361	0.5565	0.5469	0.0577	0.0673	85.7355	hardly an fat
9	M	0.4304	0.6977	0.488	0.4793	0.0489	0.0576	84.8958	no fat
9	D	0.4357	0.5226	0.4575	0.4564	0.0207	0.0218	94.9541
10	P	0.4527	0.6266	0.5088	0.498	0.0453	0.0561	80.7487	hardly an fat
10	M	0.5397	0.7128		0.576	0.0363			no intestine on foil
10	D	0.4533	0.5488	0.4794	0.4701	0.0168	0.0261	64.3678	no fat
11	P	0.495	0.7156	0.5644	0.5536	0.0586	0.0694	84.438	fat, ouside, highly vascularized
11	M	0.487	0.7345	0.5553	0.5436	0.0566	0.0683	82.8697
11	D	0.3862	0.6814	0.4534	0.4323	0.0461	0.0672	68.6012
12	P	0.524	0.7015	0.5709	0.5582	0.0342	0.0469	72.9211
12	M	0.4699	0.638	0.5241	0.5135	0.0436	0.0542	80.4428
12	D	0.4731	0.5913	0.5017	0.4926	0.0195	0.0286	68.1818
13	P	0.4915	0.678	0.4739	0.4585	-0.033	-0.0176	187.5	foil is too high
13	M	0.4949	0.7686	0.5437	0.5305	0.0356	0.0488	72.9508
13	D	0.4878	0.5582	0.5075	0.5012	0.0134	0.0197	68.0203
14	P	0.4528	0.7284	0.565	0.5452	0.0924	0.1122	82.3529
14	M	0.4271	0.723	0.5056	0.4908	0.0637	0.0785	81.1465
14	D	0.4498	0.6545	0.483	0.4746	0.0248	0.0332	74.6988
15	P	0.4256	0.7163	0.4858	0.4705	0.0449	0.0602	74.5847
15	M	0.4106	0.6463	0.4729	0.4586	0.048	0.0623	77.0465
15	D	0.4017	0.6905	0.4779	0.4586	0.0569	0.0762	74.6719	high vascularity, yellow mucus, good villi
16	P	0.4467	0.598	0.4768	0.466	0.0193	0.0301	64.1196	not a lot of fat, normal vascularization
16	M	0.4527	0.5915	0.4798	0.4711	0.0184	0.0271	67.8967	~
16	D	0.4225	0.5448	0.4428	0.4375	0.015	0.0203	73.8916	~
17	P	0.4416	0.6759	0.4922	0.4796	0.038	0.0506	75.0988
17	M	0.4028	0.6315	0.4568	0.4439	0.0411	0.054	76.1111
17	D	0.5151	0.623	0.534	0.5285	0.0134	0.0189	70.8995
18	P	0.5638	0.7695	0.667	0.6464	0.0826	0.1032	80.0388
18	M	0.475	0.7052	0.5459	0.529	0.054	0.0709	76.1636
18	D	0.4545	0.5841	0.4927	0.4815	0.027	0.0382	70.6806
19	P	0.5192	0.6585	0.5692	0.5584	0.0392	0.05	78.4
19	M	0.4618	0.5843	0.5162	0.5066	0.0448	0.0544	82.3529
19	D	0.4323	0.5421	0.4714	0.4619	0.0296	0.0391	75.7033
20	P	0.5337	0.6751		0.5676	0.0339			no intestine on foil, good vascularization, yellow mucus, PP
20	M	0.5581	0.6244	0.5919	0.5799	0.0218	0.0338	64.497
20	D	0.5396	0.587	0.5648	0.5561	0.0165	0.0252	65.4762	PP
21	P	0.5965	0.7861	0.6452	0.6315	0.035	0.0487	71.8686
21	M	0.5952	0.7759	0.6686	0.6547	0.0595	0.0734	81.0627
21	D	0.5552	0.6586	0.5792	0.5703	0.0151	0.024	62.9167	good villi, red on one end, highly vascularized
22	P	0.5046	0.6809	0.5779	0.5652	0.0606	0.0733	82.6739	very red/ good villi, highly vascularized
22	M	0.4462	0.6598	0.5075	0.4919	0.0457	0.0613	74.5514	lots of villi, good vasc.
22	D	0.402	0.5204	0.4291	0.4217	0.0197	0.0271	72.6937	very plain, yellow mucus
23	P	0.3913	0.5692	0.4738	0.4575	0.0662	0.0825	80.2424	really red, lots of villi, highly vascularized
23	M	0.3966	0.5464	0.4709	0.4586	0.062	0.0743	83.4455	~
23	D	0.4777	0.5805	0.501	0.4929	0.0152	0.0233	65.2361	~
24	P	0.4468	0.7165	0.5101	0.4968	0.05	0.0633	78.9889	red
24	M	0.4694	0.6379	0.512	0.5018	0.0324	0.0426	76.0563	red
24	D	0.4442	0.742	0.5512	0.544	0.0998	0.107	93.271	small
25	P	0.5052	0.6807	0.5523	0.5411	0.0359	0.0471	76.2208	red
25	M	0.5944	0.7566	0.6381	0.6288	0.0344	0.0437	78.7185	red
25	D	0.6084	0.823	0.6803	0.6681	0.0597	0.0719	83.032	lots of red, PP
26	P	0.5789	0.7889	0.6332	0.6196	0.0407	0.0543	74.954	2 PPs, redness, vasculature
26	M	0.4653	0.6107	0.5205	0.5069	0.0416	0.0552	75.3623	redness, vasculature
26	D	0.4783	0.6345	0.518	0.5097	0.0314	0.0397	79.0932	~
27	P	0.5828	0.7681	0.6534	0.6362	0.0534	0.0706	75.6374	lots of red
27	M	0.478	0.6862	0.5801	0.5635	0.0855	0.1021	83.7414	some red
27	D	0.5147	0.7278	0.55	0.5386	0.0239	0.0353	67.7054	PP, some red

## Sheet: Sheet1
Animal #	Region	Foil	Wet Tissue (mucosa and intestine)	All Dry (Mucosa/Tissue/Foil)	Foil + Dry Mucosa (Remove Tissue)	Dry Mucosa (Subract foil)	Dry Tissue (All Dry-Foil)	Dry Mucosa Dry Tissue= %Mucosa
4	P	0.4353	0.5204	0.5036	0.4699	0.0346	0.0683	50.6589	Really red mucosa						avg prox	4 prox
8	P	0.3795	0.6173	0.4296	0.4174	0.0379	0.0501	75.6487	highly vascularized, fat						76.2391	50.66
12	P	0.524	0.7015	0.5709	0.5582	0.0342	0.0469	72.9211
15	P	0.4256	0.7163	0.4858	0.4705	0.0449	0.0602	74.5847							avg mid	4 mid
19	P	0.5192	0.6585	0.5692	0.5584	0.0392	0.05	78.4							81.3756	65.56
23	P	0.3913	0.5692	0.4738	0.4575	0.0662	0.0825	80.2424	really red, lots of villi, highly vascularized
27	P	0.5828	0.7681	0.6534	0.6362	0.0534	0.0706	75.6374	lots of red						avg dist	4 dist
4	M	0.4743	0.6236	0.5376	0.5158	0.0415	0.0633	65.5608	fat al along tissue section-barely red						71.9354	71.488
8	M	0.4141	0.6113	0.4631	0.4539	0.0398	0.049	81.2245	some vascularization, good amount of fat
12	M	0.4699	0.638	0.5241	0.5135	0.0436	0.0542	80.4428
15	M	0.4106	0.6463	0.4729	0.4586	0.048	0.0623	77.0465								Daniel Fast Exercise	Daniel Fast Sedentary	Western Diet Exercise	Western diet Sedentary
19	M	0.4618	0.5843	0.5162	0.5066	0.0448	0.0544	82.3529							Proximal Wet Mass (g)	0.735	0.65	0.648	0.685
23	M	0.3966	0.5464	0.4709	0.4586	0.062	0.0743	83.4455	~						Mid Wet Mass (g)	0.687	0.619	0.638	0.715
27	M	0.478	0.6862	0.5801	0.5635	0.0855	0.1021	83.7414	some red						Distal Wet Mass (g)	0.6	0.621	0.578	0.687
4	D	0.4564	0.6198	0.5041	0.4905	0.0341	0.0477	71.4885	fatty-looks like sponge							Daniel Fast Exercise	Daniel Fast Sedentary	Western Diet Exercise	Western diet Sedentary
8	D	0.4156	0.5959	0.4684	0.4579	0.0423	0.0528	80.1136	fatty						Proximal Dry mass (g)	0.08	0.061	0.054	0.052
12	D	0.4731	0.5913	0.5017	0.4926	0.0195	0.0286	68.1818							Mid Dry Mass (g)	0.069	0.066	0.051	0.061
15	D	0.4017	0.6905	0.4779	0.4586	0.0569	0.0762	74.6719	high vascularity, yellow mucus, good villi						Distal Dry mass (g)	0.04	0.043	0.042	0.042
19	D	0.4323	0.5421	0.4714	0.4619	0.0296	0.0391	75.7033
23	D	0.4777	0.5805	0.501	0.4929	0.0152	0.0233	65.2361	~
27	D	0.5147	0.7278	0.55	0.5386	0.0239	0.0353	67.7054	PP, some red
Rat ID	Diet	Intervention	Group #	TOD weight	TOD	Intestinal length	Proximal mass	Mid Mass	Distal mass	Total intestinal mass	intestine mass/body mass
4	Daniel Fast	sedentary	2	480.35	0.4	124	3.4902	2.7601	2.3469	8.5972	0.0178978
8	Daniel Fast	sedentary	2	529.21	0.471528	132	3.6353	2.5215	2.7726	8.9294	0.0168731
12	Daniel Fast	sedentary	2	451.67	0.397917	118	2.295	1.831	1.2995	5.4255	0.0120121
15	Daniel Fast	sedentary	2	496.65	0.459722	139	3.1219	3.3905	3.0277	9.5401	0.0192089
19	Daniel Fast	sedentary	2	521.33	0.381944	131	2.8261	2.4587	2.531	7.8158	0.014992
23	Daniel Fast	sedentary	2	478.83	0.440972	125	3.0194	2.583	2.1287	7.7311	0.0161458
27	Daniel Fast	sedentary	2	646.35	0.467361	132	21.6454	3.9856	3.0318	2.6529	0.00410443

## Sheet:  % mucosa
		P	M	D	TOTAL
Animal #	Group	Dry Mucosa Dry Tissue= %Mucosa	Dry Mucosa Dry Tissue= %Mucosa	Dry Mucosa Dry Tissue= %Mucosa	Dry Mucosa Dry Tissue= %Mucosa	Prox wt	prox mucosa g	g/kg	Prox g mucosa/kg	mid wt	mid mucosa g	g/kg	Mid g mucosa/kg	dist wt	dist mucosa g	g/kg	Dist g mucosa/kg	tot mucosa	tot mucosa g/kg	body wt
3	1	88.6414	78.0992		83.3703	2.4247	2.14929	4.82566	4.27753	2.2867	1.78589	4.55101	3.5543	2.0609		4.10162	3.41953			502.46
7	1	84.3305	86.0437	75.1534	81.8425	2.418	2.03911	4.86754	4.10482	2.4104	2.074	4.85224	4.17505	2.3614	1.77467	4.7536	3.89047	5.88778	11.8524	496.76
11	1	84.438	82.8697	68.6012	78.6363	2.391	2.01891	4.76779	4.02583	2.491	2.06428	4.9672	4.1163	2.47	1.69445	4.92532	3.87309	5.77765	11.521	501.49
14	1	82.3529	81.1465	74.6988	79.3994	3.5298	2.90689	6.38104	5.25497	3.5402	2.87275	6.39984	5.19325	1.6889	1.26159	3.05313	2.42417	7.04123	12.7289	553.17
18	1	80.0388	76.1636	70.6806	75.6277	2.6992	2.16041	5.20639	4.16713	2.8845	2.19694	5.56381	4.2376	2.26	1.59738	4.35923	3.29679	5.95473	11.4859	518.44
22	1	82.6739	74.5514	72.6937	76.6397	3.1969	2.643	6.10655	5.04852	2.4694	1.84097	4.71692	3.51653	1.575	1.14493	3.00848	2.30569	5.6289	10.752	523.52
26	1	74.954	75.3623	79.0932	76.4698	3.2904	2.46629	6.16411	4.62024	2.4224	1.82558	4.53803	3.41996	2.7886	2.20559	5.22405	3.99482	6.49745	12.1721	533.8
4	2			71.4885	71.4885	3.4902		7.26595		2.7601		5.74602		2.3469	1.67776	4.88581	3.49279			480.35
8	2	75.6487	81.2245	80.1136	78.9956	3.6353	2.75006	6.8693	5.19653	2.5215	2.04808	4.76465	3.87006	2.7726	2.22123	5.23913	4.13868	7.01936	13.2639	529.21
12	2	72.9211	80.4428	68.1818	73.8486	2.295	1.67354	5.08114	3.70523	1.831	1.47291	4.05384	3.26103	1.2995	0.886023	2.8771	2.1247	4.03247	8.92791	451.67
15	2	74.5847	77.0465	74.6719	75.4344	3.1219	2.32846	6.28592	4.68833	3.3905	2.61226	6.82674	5.25977	3.0277	2.26084	6.09624	4.59867	7.20157	14.5003	496.65
19	2	78.4	82.3529	75.7033	78.8188	2.8261	2.21566	5.42094	4.25002	2.4587	2.02481	4.71621	3.88393	2.531	1.91605	4.85489	3.82656	6.15653	11.8093	521.33
23	2	80.2424	83.4455	65.2361	76.308	3.0194	2.42284	6.30579	5.05992	2.583	2.1554	5.3944	4.50138	2.1287	1.38868	4.44563	3.39237	5.96692	12.4615	478.83
27	2	75.6374	83.7414	67.7054	75.6947	3.9856	3.0146	6.16632	4.66404	3.0318	2.53887	4.69065	3.92802	2.6529	1.79616	4.10443	3.10684	7.34963	11.371	646.35
1	3	87.602	81.7204	61.8605	77.061	3.7106	3.25056	6.7864	5.94502	3.4149	2.79067	6.24559	5.10392	1.3674	0.84588	2.50087	1.92719	6.88711	12.596	546.77
5	3	78.9809	80.7566	66.313	75.3502	2.4	1.89554	4.37948	3.45895	2.743	2.21515	5.00538	4.04218	2.2383	1.48428	4.08441	3.07761	5.59498	10.2096	548.01
9	3	85.7355	84.8958	94.9541	88.5285	2.217	1.90076	3.50314	3.00344	2.524	2.14277	3.98824	3.38585	2.0078	1.90649	3.17258	2.80864	5.95002	9.40179	632.86
16	3	64.1196	67.8967	73.8916	68.636	2.0483	1.31336	4.15586	2.66472	2.0436	1.38754	4.14633	2.81522	1.3968	1.03212	2.83401	1.94515	3.73302	7.57404	492.87
20	3		64.497	65.4762	64.9866	2.2572		4.552		1.5269	0.984805	3.07923	1.98602	1.5824	1.0361	3.19116	2.07383			495.87
24	3	78.9889	76.0563	93.271	82.7721	3.048	2.40758	4.96175	3.91923	2.016	1.5333	3.28178	2.496	2.6809	2.5005	4.36415	3.6123	6.44138	10.4857	614.3
2	4	84.0726		87.5283	85.8005	2.7014	2.27114	4.46018	3.74979	2.9085		4.80212		2.3698	2.07425	3.91269	3.35711			605.67
6	4	81.7221	86.2426	84.1463	84.037	2.8618	2.33872	5.58335	4.56283	3.3833	2.91785	6.60079	5.69269	2.8616	2.40793	5.58296	4.69175	7.6645	14.9534	512.56
10	4	80.7487		64.3678	72.5582	2.1406	1.72851	3.79418	3.06375	2.6406		4.68042		1.1751	0.756386	2.08285	1.51128			564.18
13	4		72.9508	68.0203	70.4856	2.823		4.76689		2.6593	1.93998	4.49047	3.27583	1.3294	0.904262	2.24481	1.58227			592.21
17	4	75.0988	76.1111	70.8995	74.0365	3.2096	2.41037	4.6166	3.46701	2.7761	2.11292	3.99307	3.03917	1.9679	1.39523	2.83057	2.09566	5.91852	8.51304	695.23
21	4	71.8686	81.0627	62.9167	71.9493	3.3375	2.39861	5.64377	4.0561	3.1353	2.54156	5.30185	4.29782	0.9759	0.614004	1.65026	1.18735	5.55418	9.39221	591.36
25	4	76.2208	78.7185	83.032	79.3238	3.0422	2.31879	4.55017	3.46818	2.2252	1.75164	3.3282	2.61991	2.7508	2.28404	4.11433	3.26364	6.35448	9.5043	668.59

## Sheet: Sheet6
			Tare + Tissue
Tare (P)	Tare (M)	Tare (D)	Wet mass (P)	Wet mass (M)	Wet mass (D)	Dry mass (P)	Dry mass (M)	Dry mass (D)	% mucosa (P)	% mucosa (M)	% mucosa (D)
0.4444	0.403	0.4296	0.7674	0.6765	0.731	0.5229	0.4289	0.4631	0.4969	0.4115	0.4517
0.5252	0.6273	0.4906	0.7484	0.9231	0.6628	0.5206	0.5466	0.3591	0.5023	0.5324	0.3459
0.4797	0.6424	0.5611	0.7072	0.9	0.8615	0.5327	0.4752	0.484	0.4984	0.4579	0.4673
0.39	0.4077	0.4401	0.5754	0.5745	0.5162
0.4343	0.4612	0.4464	0.6405	0.6626	0.556
0.4827	0.4072	0.4155	0.6135	0.5152
0.4353	0.4743	0.4564	0.5204	0.6236	0.6198
0.4587	0.4928	0.4232	0.6157	0.6902	0.5628
0.4197	0.5095	0.4816	0.6404	0.7492	0.7719
0.5076	0.4629	0.3894	0.7284	0.6906	0.5241
0.3795	0.4141	0.4156	0.6173	0.6113	0.5959
0.4892	0.4304	0.4357	0.7361	0.6977	0.5526
0.4527	0.5397	0.4533	0.6266	0.7128	0.5488
0.495	0.487	0.3862	0.7156	0.7345	0.6814
0.524	0.4699	0.4731	0.7015	0.638	0.5913
0.4915	0.4949	0.4878	0.678	0.7687	0.5582
0.4528	0.4271	0.4498	0.7284	0.723	0.6545
0.4256	0.4106	0.4017	0.7163	0.6463	0.6905
0.4467	0.4527	0.4225	0.598	0.5915	0.5448
0.4413	0.4028	0.5151	0.6759	0.6315	0.623
0.5638	0.475	0.4545	0.7695	0.7052	0.5841
0.5192	0.4618	0.4323	0.6585	0.5843	0.5421
0.5337	0.5581	0.5396	0.6751	0.6244	0.587
0.5965	0.5952	0.5552	0.7861	0.7759	0.6586
0.5046	0.4462	0.402	0.6809	0.6598	0.5204
0.3913	0.3966	4.777	0.5692	0.5464	0.5805
0.4468	0.4694	0.4442	0.7165	0.6379	0.742
0.5052	0.5944	0.6084	0.6807	0.7566	0.823
0.5789	0.4653	0.7483	0.7889	0.6107	0.6345
0.5828	0.478	0.5147	0.7681	0.6862	0.7278
