# Supplementary material for: Intestinal adaptations to a combination of different diets with and without endurance exercise
Source: J Int Soc Sports Nutr. 2016 Sep 14;13:35. doi: 10.1186/s12970-016-0147-6 (PMC5024503; doi:10.1186/s12970-016-0147-6)
Supplement: Additional file 4: — Spreadsheet of data for histology measurements. (XLSX 23 kb) [file 12970_2016_147_MOESM4_ESM.xlsx]

## Sheet: Sheet1
RAT #:	1				RAT #:	1
SECTION:	PROX				SECTION:	MID
CIRCUMFERENCE:	8489.68				CIRCUMFERENCE:	9054.81
AREA:	5.32914e+06				AREA:	6.08573e+06
CRYPT	VILLUS HEIGHT:	VILLUS WIDTH			CRYPT	VILLUS HEIGHT:	VILLUS WIDTH
151.58	540.67	153.56			141.21	646.38	98.7
141.05	556.44	135.93			124.59	637.31	158.13
96.9	272.98	178.3			105.06	529.95	63.24
87.67	383.78	170.52			139.01	600.91	185.91
114.11	380.69	152.34			95.18	616.47	123.63
115.46	303.9	138.39			102.17	468.86	170.38
128.31	426.13	131.04			83.08	536.25	192.62
76.69	399.38	124.4			120.33	577.1	174.8
108.45	439.07	122.08			102.36	475.23	104.56
109.96	466.16	175.78			72.44	505.14	176.84
158.33	342.84	80.65			105.17	604.82	104.34
113.1	524.99	116.25			113.48	649.78	145.88
102.63	550.41	73.81			120.36	384.42	109.84
97.5	334.89	171.93			105.17	553.58	111.82
114.41	423.024		0.270458
RAT #:	5				RAT #:	5				RAT #:	5
SECTION:	PROX				SECTION:	MID				SECTION:	DIST
CIRCUMFERENCE:	9706.07				CIRCUMFERENCE:	9883.4				CIRCUMFERENCE:	9008.82
AREA:	6.84325e+06				AREA:	7.22657e+06				AREA:	5.93174e+06
CRYPT	VILLUS HEIGHT:	VILLUS WIDTH			CRYPT	VILLUS HEIGHT:	VILLUS WIDTH			CRYPT	VILLUS HEIGHT:	VILLUS WIDTH
70.18	565.61	141.73			126.79	839.05	182.43			125.82	432.27	191.87
98.99	512.24	172.61			188.66	810.38	134.16			126.04	476.54	179.08
114.84	499.12	113.34			171.68	906.9	164.64			123.61	473.78	162.99
80.91	548.79	137.77			157.21	885.42	120.79			135.64	482.62	124.26
108.91	553.55	115.65			165.35	899.97	191.48			158.83	482.62	124.26
85.14	575.66	109.07			128.75	838.67	306.92			163.09	271.95	143.74
199.07	580.54	75.08			127.84	774.38	124.79			176.99	416.72	112.88
144.51	603.08	164.28			136.54	678.69	125.97			111.69	404.03	154.89
149.4	587.85	147.78			97.71	669.31	184.18			160.97	380.86	137.58
139.94	407.61	154.04			124.15	834.09	119.13			140.71	386.19	121.4
148.91	675.01	142.34				787.12	84			146.28
165.45	534.01	120.88				731.52	180.53
127.26	590.67	125.34				816.52	124.05
129.66	597.4	100.33				696.35	373.31
RAT #:	20				RAT #:	20				RAT #:	20
SECTION:	PROX				SECTION:	MID				SECTION:	DIST
CIRCUMFERENCE:	9272.02				CIRCUMFERENCE:	8558.64				CIRCUMFERENCE:	8509.7
AREA:	5.53633e+06				AREA:	5.01033e+06				AREA:	3.95265e+06
CRYPT	VILLUS HEIGHT:	VILLUS WIDTH			CRYPT	VILLUS HEIGHT:	VILLUS WIDTH			CRYPT	VILLUS HEIGHT:	VILLUS WIDTH
114.63	704.94	200.71			117.04	625.4	170.98			121.08	292.54	126.43
107.06	557.38	113.64			144.12	492.26	144.95			108.57	254.94	120.58
100.13	706.92	165.12			140.61	454.08	71.74			97.45	233.88	141.95
123.92	748.82	95.98			110.29	364.54	131.94			121.91	307.02	174.3
104.5	608.31	105.87			99.52	377.94	233.5			142.59	275.02	104.18
89.33	345.68	136.55			133.91	382.74	149.84			158.01	308.33	199.48
96.84	356.25	131.17			163.03	488.92	125.67			118.87	291.56	135.36
106.74	279.85	216.66			125.41	352.34	138.77			143.95	286.78	125.36
132.9	341.16	121.13			134.92	384.94	172.96			126.87	240.75	111.17
157.9	401.1	128.92			113.67	447.78	213.05			138.29	319.92	151.42
RAT #:	24				RAT #:	24				RAT #:	24
SECTION:	PROX				SECTION:	MID				SECTION:	DIST
CIRCUMFERENCE:	10100.2				CIRCUMFERENCE:	11216.4				CIRCUMFERENCE:	10154.5
AREA:	7.79426e+06				AREA:	8.86397e+06				AREA:	6.35983e+06
CRYPT	VILLUS HEIGHT:	VILLUS WIDTH			CRYPT	VILLUS HEIGHT:	VILLUS WIDTH			CRYPT	VILLUS HEIGHT:	VILLUS WIDTH
205.05	416.93	146.13			140.59	275.57	195.73			112.08	319.79	131.55
152.91	543.19	112.48			137.96	216.85	149.61			144.55	333.29	100.33
87.59	417.52	166.44			164.7	253.45	220.11			197.18	304.83	128.53
185.47	416.68	225.54			135.01	288.59	266.85			179.35	436.35	159.26
89.06	985.17	77.4			171.17	322.79	192.03			197.48	312.13	107.54
138.03	823.87	124.8			124.25	286.76	103.32			198.71	350.16	123.11
104.54	774.7	141.97			167.73	392.56	137.7			156.93	304.87	158.11
121.88	183.45	111.57			153.34	421.68	163.27			181.31	329.42	159.15
81.5	837.29	253.05			191.23	501.51	192.38			165.4	364.43	197.34
123.16	354.14	177.87			177.81	601.26	170.76			157.63	348.28	155.56
										149.12
RAT #:	2				RAT #:	2				RAT #:	2
SECTION:	PROX				SECTION:	MID				SECTION:	DIST
CIRCUMFERENCE:	10541.3				CIRCUMFERENCE:	10119				CIRCUMFERENCE:	10689.5
AREA:	8.53072e+06				AREA:	7.76396e+06				AREA:	5.33481e+06
CRYPT	VILLUS HEIGHT:	VILLUS WIDTH			CRYPT	VILLUS HEIGHT:	VILLUS WIDTH			CRYPT	VILLUS HEIGHT:	VILLUS WIDTH
115.9	817.2	169.02			188.71	724.19	204.13			126.45	368.73	121.81
123.43	597.69	161.95			220.08	573.97	150.26			152.68	423.74	135.67
134.17	465.46	208.49			202.16	552.99	191.2			85.14	279.5	151.86
170.83	257.51	125.46			137.39	468	136.23			117.51	349.13	130.21
183.93	314.17	136.62			223.56	647.16	149.64			124.39	301.57	134.77
172.9	425.07	106.75			118.74	777.72	141.97			165.48	271.77	125.07
103.88	482.34	194.81			138.39	633	170.36			180.66	339.59	85.88
111.69	327.51	121.78			155.51	765.66	144.57			156.06	411.05	112.68
147.23	568.87	273.71			121.69	771.17	119.12			175.21	363.85	119.33
					127.73	735.45	215.48			117.05	300.62	96.77
										108.27	258.01	70.67
RAT #:	6				RAT #:	6				RAT #:	6
SECTION:	PROX				SECTION:	MID				SECTION:	DIST
CIRCUMFERENCE:	10658.3				CIRCUMFERENCE:	11831.3				CIRCUMFERENCE:	12063.5
AREA:	8717075				AREA:	9.39463e+06				AREA:	8.38889e+06
CRYPT	VILLUS HEIGHT:	VILLUS WIDTH			CRYPT	VILLUS HEIGHT:	VILLUS WIDTH			CRYPT	VILLUS HEIGHT:	VILLUS WIDTH
161.29	682.08	163.17			152.12	482.31	315.6			137.75	311.26	121.46
114.35	681.3	201.24			162.05	498.82	136.67			138.48	400.68	188.07
176.39	694.69	174.07			122.76	445.14	129.36			175.09	290.3	187.07
147.27	630.15	135.44			134.11	492.51	140.69			97.11	341.17	113.84
91.13	496.68	175.52			139.56	540.45	124.37			153.9	339.7	162.31
94.88	693	289.14			147.85	518.88	120.73			122.63	365.92	271.73
149.71	577.57	169.27			153.1	606.44	120.66			182.89	370.46	151.35
130.27	464.6	141.86			141.63	534.11	141.14			136.1	381.86	191.45
100.36	521.17	127.09			137.04	575.64	95.35			165.57	306.79	183.98
116.76	613.05	125.19			125.21	458.15	117.26			214.01	356.11	165.21
	540.52	231.2
RAT #:	21				RAT #:	21				RAT #:	21
SECTION:	PROX				SECTION:	MID				SECTION:	DIST
CIRCUMFERENCE:	9766.03				CIRCUMFERENCE:	9253.95				CIRCUMFERENCE:	9573.36
AREA:	6.54151e+06				AREA:	5.5561e+06				AREA:	5.44905e+06
CRYPT	VILLUS HEIGHT:	VILLUS WIDTH			CRYPT	VILLUS HEIGHT:	VILLUS WIDTH			CRYPT	VILLUS HEIGHT:	VILLUS WIDTH
174.87	485.3	141.41			115.94	463.52	123.74			248.67	497.79	65.35
145.8	400.09	114.39			159.32	471.21	128.65			209.78	374.17	114.95
144.05	444.57	202.79			153.79	492.33	101.58			233.82	257.07	88.86
144.02	432.63	157.41			78.22	445.5	237.78			294.6	221.97	49.23
177.56	421.32	158.11			124.49	420.6	148.4			178.36	220.8	33.85
167.07	310.02	94.85			148.4	344.24	158.5			157.98	185.12	54.74
154.03	375.64	159.96			128.09	320.52	134.85			168.7	256.35	73.98
102.57	397.94	140.04			78.69	484.31	108.84			182.49	258.63	58.75
113.49	378.21	112.55			137.26	440.61	236.37			125.03	201.57	72.13
164.25	412.01	157.33			138.57	498.59	109.04			145.53	221.53	73.02
					123.36	462.65	110.6
					114.35	413.52	125.05
RAT #:	25				RAT #:	25				RAT #:	25
SECTION:	PROX				SECTION:	MID				SECTION:	DIST
CIRCUMFERENCE:	9331.92				CIRCUMFERENCE:	9925.92				CIRCUMFERENCE:	9621.23
AREA:	6.34045e+06				AREA:	7.23107e+06				AREA:	5.89026e+06
CRYPT	VILLUS HEIGHT:	VILLUS WIDTH			CRYPT	VILLUS HEIGHT:	VILLUS WIDTH			CRYPT	VILLUS HEIGHT:	VILLUS WIDTH
154.4	485.36	164.93			173.58	515.27	104.26			126	311.81	160.67
149.51	429.33	161.29			143.83	396.27	137.44			158.25	171.38	150
168.76	555.68	111.87			153.67	731.06	192.63			147.6	429.78	202.39
123.55	345.75	139.66			148.3	708.33	199.5			109.7	447.02	180.01
132.66	710.78	156.63			198.59	737.1	225.57			115.61	301.79	222.82
134.42	811.84	150.44			163.13	624.93	125.67			111.45	339.4	144.15
208.91	787.18	72.97			243.19	577.29	244.2			103.3	330.54	149.31
129.25	467.96	135.55			233.57	649.1	131.46			120.13	326.68	142.68
128.81	320	162.22			156.44	785.74	167.11			110.55	458.6	136.74
154.17	291.96	161.2			123.8	854.83	145.91			103.53	430.22	168.18
147.4	618.94	160.56									359.09	138.94
											424.16	111.82
											292.26	200.27
RAT #:	3				RAT #:	3				RAT #:	3
SECTION:	PROX				SECTION:	MID				SECTION:	DIST
CIRCUMFERENCE:	9037.49				CIRCUMFERENCE:	9494.57				CIRCUMFERENCE:	8620.82
AREA:	6.01492e+06				AREA:	5.22096e+06				AREA:	4.88483e+06
CRYPT	VILLUS HEIGHT:	VILLUS WIDTH			CRYPT	VILLUS HEIGHT:	VILLUS WIDTH			CRYPT	VILLUS HEIGHT:	VILLUS WIDTH
164.57	520.22	141.01			122.65	244.97	152.95			145.14	287.85	143.7
196.28	656.76	114.48			132.09	224.15	140.24			126.89	311.85	105.92
209.51	620.06	151.99			128.73	256.77	134.44			126.53	304.58	151.63
169.12	547.5	153.77			126.28	219.43	136.79			118.99	346.75	88.6
199.76	441.18	137.32			120.86	326.09	80.6			70.59	190.67	60.85
140.34	403.5	181.8			161.03	229.36	79.52			120.96	375.73	133.18
144.64	496.71	118.56			126.03	351.48	91.44			112.95	335.29	163.4
142.45	490.09	114.52			168.23	219.71	137.2			189.09	325.55	102.18
129.02	442.01	105.77			136.74	281.33	131.37			124.18	290.13	169.14
105.26	459.45	122.01			111.39					82.86	330.1	257.35
	113.17				125.45
RAT #:	7				RAT#:	7				RAT #:	7
SECTION:	PROX				SECTION:	MID				SECTION:	DIST
CIRCUMFERENCE:	10049.3				CIRCUMFERENCE:	8897.3				CIRCUMFERENCE:	8810.44
AREA:	7.68519e+06				AREA:	5.4308e+06				AREA:	5.15713e+06
CRYPT	VILLUS HEIGHT:	VILLUS WIDTH			CRYPT	VILLUS HEIGHT:	VILLUS WIDTH			CRYPT	VILLUS HEIGHT:	VILLUS WIDTH
141.85	718.65	85.69			130.46	447.37	188.56			139.97	455.23	113.41
142.64	805.84	114.52			112.33	459.22	138.21			149.2	355.65	139.36
105.79	713.41	106.7			127.76	427.59	213.85			135.62	409.12	135.48
187	725.76	150.99			76.11	343.02	143.51			188.96	407.63	121.88
160.67	524.97	204.13			110.96	309.28	154.27			173.35	420.16	99.69
166.5	436.76	171.83			136.64	334.24	93.53			237.31	397.3	143.35
133.25	721.76	173.8			114.08	328.9	148.16			188.43	400.56	97.23
186.54	828.88	124.25			113.57	317.54	123.13			163.61	384.49	100.84
171.05	834.02	107.7			127.76	325.9	150.16			127.78	500.45	147.8
148.62	760.35	89.34			127.23	317.19	122.18			116.62	426.94	119.81
150.32	735.5	157.39								151.37
	757.18	158.63								148.73
RAT #:	18				RAT #:	18				RAT #:	18
SECTION:	PROX				SECTION:	MID				SECTION:	DIST
CIRCUMFERENCE:	10063.3				CIRCUMFERENCE:	12785.5				CIRCUMFERENCE:	12340.6
AREA:	7.30216e+06				AREA:	9.42398e+06				AREA:	7.92302e+06
CRYPT	VILLUS HEIGHT:	VILLUS WIDTH			CRYPT	VILLUS HEIGHT:	VILLUS WIDTH			CRYPT	VILLUS HEIGHT:	VILLUS WIDTH
172.94	481.21	110.31			126.77	390.75	127.77			190.48	336.71	218.5
161.41	600.08	138.39			127.1	444.27	146.41			188.72	258.61	151.88
204.09	523.62	77.02			137.4	265.41	107.18			188.13	220.02	169.58
163.3	651.8	143.22			118.91	359.27	83.56			145.26	271.24	133.83
128.53	445.95	159.67			177.12	428.12	102.7			184.28	279.77	211.83
205.25	739.22	100.47			163.01	355.4	111.74			159.26	251.63	131.69
260.71	424.88	104.98			127.48	416.7	111.82			205.24	337.37	123.26
118.16	602.32	154.35			123.66	463.62	108.41			117.4	168.33	134.53
184.58	545.54	137.74			106.8	544.66	128.38			126.43	260.87	181.75
171.34	584.54	104.13			162.66	403.53	142.09			166.61	196.66	166.51
207.4	603.63	101.91			129.66	419.81	99.29			143.26	222.61	155.67
153.67	513.33	70.42			138.1	413.69	148.78
						368.66	113.67
RAT #:	22				RAT #:	22				RAT #:	22
SECTION:	PROX				SECTION:	MID				SECTION:	DIST
CIRCUMFERENCE:	10364				CIRCUMFERENCE:	9368.43				CIRCUMFERENCE:	10028.7
AREA:	8.01311e+06				AREA:	6.71109e+06				AREA:	5.74611e+06
CRYPT	VILLUS HEIGHT:	VILLUS WIDTH			CRYPT	VILLUS HEIGHT:	VILLUS WIDTH			CRYPT	VILLUS HEIGHT:	VILLUS WIDTH
158.96	619.05	158.69			200.19	450.52	127.21			227.69	372.7	135.49
126.28	613.89	148.91			149.4	473.43	115.21			217.76	412.22	176.42
169.51	587.91	274.86			121.92	414.84	163.93			100.97	335.65	195.12
184.59	655.03	133.91			122.12	459.08	243.11			111.12	275.39	164.74
157.16	662.24	166.61			161.97	656.52	156.93			149.75	239.99	103.01
147.71	598.74	91.59			142.05	744.75	104			160.15	400.24	235.79
133.88	510.14	138.87			162.04	846.63	129.1			146.77	241.62	241.1
122.33	495.26	88.03			164.29	608.29	110.31			127.61	274.32	158.24
80.03	463.84	76.73			148.86	646.3	127.65			239.47	283.63	221.88
137.56	621.27	110.14			200.3	696.95	112.2			188.26	336.12	213.46
107.55	623.97	223.66			173.8					262.37	305.82	209.44
										236.03	223.83	144.64
RAT #:	8				RAT #:	8				RAT #:	8
SECTION:	PROX				SECTION:	MID				SECTION:	DIST
CIRCUMFERENCE:	10002.5				CIRCUMFERENCE:	9727.43				CIRCUMFERENCE:	9215.08
AREA:	7.70287e+06				AREA:	7.21353e+06				AREA:	6.46769e+06
CRYPT	VILLUS HEIGHT:	VILLUS WIDTH			CRYPT	VILLUS HEIGHT:	VILLUS WIDTH			CRYPT	VILLUS HEIGHT:	VILLUS WIDTH
191.45	835.98	314.25			173.64	521.4	195.41			173.77	502.98	89.5
159.19	864.8	165.2			126.87	501.52	101.28			152.47	370.89	147.68
158.36	893.1	133.86			133.38	493.07	124.97			114.99	447.81	123.13
150.54	905.94	227.1			147.15	526.99	174.14			132.38	225.14	147.73
137.41	677.22	145.67			175.51	560.98	303.92			166.88	337.78	152.72
90.03	597.54	240.54			176.87	862.22	141.93			117.17	441.07	170.77
117.65	355.83	189.6			166.82	713.88	152.47			237.32	333.09	86.98
120.38	584.92	113.48			142.46	489.98	98.89			168.07	416.91	134.25
124.22	602.51	197.57			146.69	432.28	129.37			176.6	315.57	168.39
122.44	533.58	139.42			103.68	490.19	190.41			133.08	308.08	147.46
127.85
RAT #:	19				RAT #:	19				RAT #:	19
SECTION:	PROX				SECTION:	MID				SECTION:	DIST
CIRCUMFERENCE:	8577.37				CIRCUMFERENCE:	9893.57				CIRCUMFERENCE:	10962.2
AREA:	5.58996e+06				AREA:	7.39036e+06				AREA:	7624387
CRYPT	VILLUS HEIGHT:	VILLUS WIDTH			CRYPT	VILLUS HEIGHT:	VILLUS WIDTH			CRYPT	VILLUS HEIGHT:	VILLUS WIDTH
152.38	438.75	180.51			108.41	473.62	168.28			102.43	387.58	106.29
118.15	503.41	152.28			119.58	637.82	86.97			93.79	353.84	143.09
132.21	286.69	116.45			157.25	600.3	104.13			133.27	330.71	155.5
115.6	525.14	179.77			73.37	613.29	90.35			126.53	373.06	128.9
162.67	497.66	121.74			149.42	434.74	104.05			125.37	279.98	156.36
112.94	472.25	177.45			162.36	631.29	174.47			102.07	319.96	112.83
148.28	440.93	130.32			110.18	617.61	134.93			106.8	317.59	107.62
152.42	536.84	177.88			140.72	556.27	176.1			94.11	323.95	116.43
125.13	473.62	164.56			147.54	502.33	151.95			115.28	380.43	146.54
199.97	536.3	92.23			96.64	634.75	169.77			128.94	471.49	115.54
152.67	281.31	131.07			154.28	709.7	105.69			131.59
						749.73	271.93			162.07
RAT #:	23				RAT #:	23				RAT #:	23
SECTION:	PROX				SECTION:	MID				SECTION:	DIST
CIRCUMFERENCE:	10827.5				CIRCUMFERENCE:	9751.5				CIRCUMFERENCE:	9442.03
AREA:	8.93696e+06				AREA:	7.21136e+06				AREA:	4.54165e+06
CRYPT	VILLUS HEIGHT:	VILLUS WIDTH			CRYPT	VILLUS HEIGHT:	VILLUS WIDTH			CRYPT	VILLUS HEIGHT:	VILLUS WIDTH
126.25	638.07	168.08			123.17	719.63	150.44			138.52	380.34	99.35
131.95	271.57	201.5			118.07	674.78	82.72			160.79	446.79	120.9
131.55	562.44	97.36			188.05	630.56	144.48			211.08	428.82	131.54
119.48	644.32	148.84			196.96	645.74	165.2			162.41	384.05	105.21
122.39	367.81	210.61			211.9	674.4	130.64			208.3	273.46	72.66
137.1	718.74	170.74			162.02	685.33	132.66			151.04	306.91	99.89
98.59	723.23	98.58			158.64	666.36	110.79			157.23	399.59	144.64
249.97	731.65	140.84			131.51	672.35	130.23			189.47	346.39	99.96
154.18	486.46	90.38			151.2	764.59	123.13			186.25	382.7	132.72
185.51	544.11	97.13			105.45	722.72	225.85			178.04	447.43	116.1
					163.84	764.4	86.29			156.6
RAT #:	27				RAT #:	27				RAT #:	27
SECTION:	PROX				SECTION:	MID				SECTION:	DIST
CIRCUMFERENCE:	10452.5				CIRCUMFERENCE:	10919.2				CIRCUMFERENCE:	11633.7
AREA:	8.44537e+06				AREA:	7.67158e+06				AREA:	7.25502e+06
CRYPT	VILLUS HEIGHT:	VILLUS WIDTH			CRYPT	VILLUS HEIGHT:	VILLUS WIDTH			CRYPT	VILLUS HEIGHT:	VILLUS WIDTH
261.18	944.41	134.16			126	413.86	102.43			140.24	470.55	86.54
218.25	1005.3	88.78			136.1	406.44	173.17			100.33	473.5	182.74
138.42	935.03	95.15			110.13	404.36	94.89			142.52	467.92	177.23
161.55	1031.6	78.59			181.34	411.02	149.47			90.34	346.66	198.04
173.7	919.44	91.44			112.89	456.27	169.77			119.13	267.13	115.12
117.29	559.88	277.87			131.19	520.73	177.63			163.14	415.62	116.96
129.66	628.46	99.68			106.65	417.36	99.59			127.38	438.7	90.38
164.42	483.95	105.64			182.44	683.76	112.18			157.39	460.1	74.17
150.5	792.49	181.78			152.01	660.27	78.53			114.23	476.55	124.49
124.83	820.42	139.42			135.91	710.53	79.34			115.9	453.59	67.54
108.48	612.63	161.53									361.79	115.4
